# Supplementary material for: Selective fluorometric detection of pyrophosphate by interaction with alizarin red S–dimethyltin(iv) complex
Source: Royal Society of Chemistry journal article supplement (doi:10.1039/c0cc05346e), 2011-01-01
Supplement: c0cc05346e.pdf [file c0cc05346e.pdf]

## Electronic Supplementary Information to

### Selective fluorometric detection of pyrophosphate by interaction with alizarin red S - dimethyltin(IV) complex

Raul Villamil-Ramos and Anatoly K. Yatsimirsky

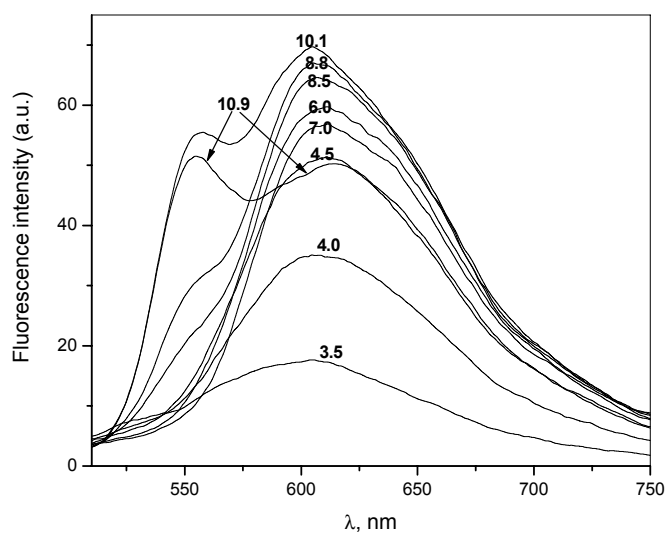

Figure S1. Fluorescence spectra of 30  $\mu\text{M}$  ARS in the presence of 40  $\mu\text{M}$   $\text{Me}_2\text{SnCl}_2$  at different pH.

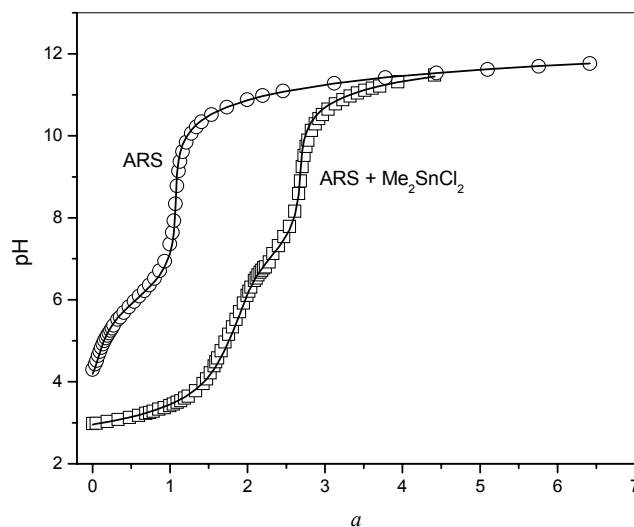

Figure S2. Potentiometric titrations of 0.72 mM ARS (circles) and 0.72 mM ARS plus 1.0 mM Me<sub>2</sub>SnCl<sub>2</sub> (squares) by NaOH in water with 5 mM NaCl as background electrolyte;  $a$  is the number of added equivalents of NaOH. Solid lines are the fitting curves generated by Hyperquad 2003.

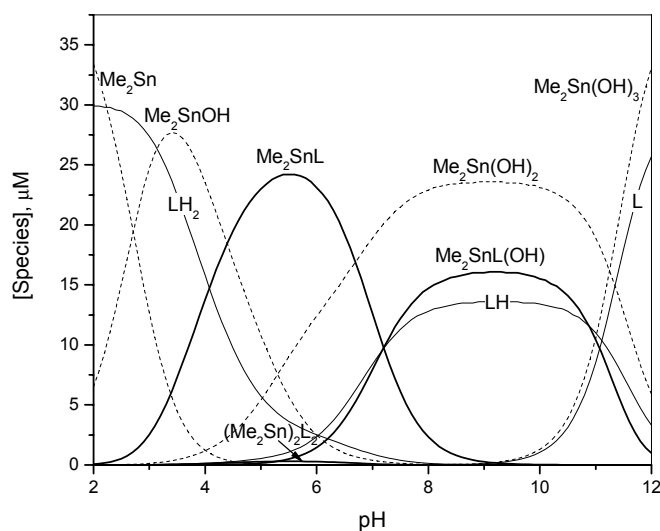

Figure S3. Species distribution diagram for the mixture of 30  $\mu\text{M}$  ARS and 40  $\mu\text{M}$  Me<sub>2</sub>SnCl<sub>2</sub>.

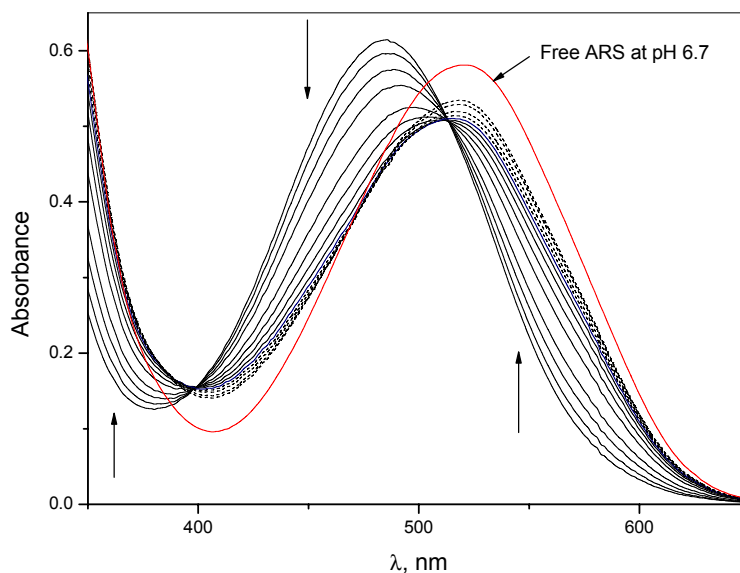

Figure S4. Spectrophotometric titration of the mixture of 70  $\mu\text{M}$  ARS and 100  $\mu\text{M}$   $\text{Me}_2\text{SnCl}_2$  in 5 mM phosphate buffer at pH 6.7 by PPI. Solid lines are recorded in the concentration range 0-0.5 mM PPI and dashed lines in the range 0.5-2 mM PPI. Arrows show the directions of spectral changes at increasing concentrations of PPI. The red line is the spectrum of free ARS.

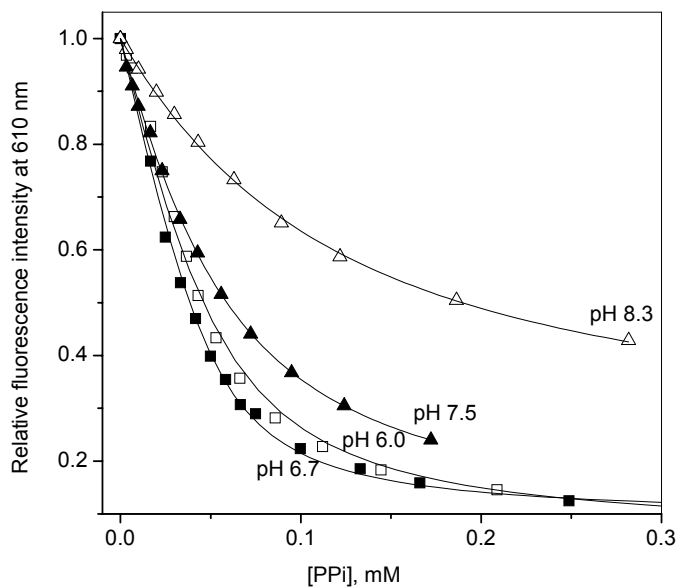

Figure S5. Fluorometric titrations of the mixture of 30  $\mu\text{M}$  ARS and 40  $\mu\text{M}$   $\text{Me}_2\text{SnCl}_2$  in 5 mM phosphate buffer by PPI at different pH values.

Table S1. Apparent binding constants of anions to the dimethyltin(IV)-ARS complex obtained by fluorometric titrations in 5 mM phosphate buffer solution at 25°C.

| <b>Anion</b>                     | <b>pH</b> | <b>K<sub>app</sub>, M<sup>-1</sup></b> |
|----------------------------------|-----------|----------------------------------------|
| HPO <sub>4</sub> <sup>2-</sup>   | 6.7       | 130±10                                 |
| MeOPO <sub>3</sub> <sup>2-</sup> | 6.7       | 180±50                                 |
| Glucose-6-P                      | 6.7       | 330±70                                 |
| AMP                              | 6.7       | 330±50                                 |
| ADP                              | 6.7       | 590±40                                 |
| ATP                              | 6.7       | 920±80                                 |
| PPi                              | 6.7       | (5.9±0.3)×10 <sup>4</sup>              |
| PPi <sup>a)</sup>                | 6.7       | (6.4±0.8)×10 <sup>4</sup>              |
| PPi                              | 6.0       | (3.3±0.3)×10 <sup>4</sup>              |
| PPi                              | 7.5       | (3.0±0.1)×10 <sup>4</sup>              |
| PPi                              | 8.3       | (9.3±0.4)×10 <sup>3</sup>              |

<sup>a)</sup> in 5 mM MOPS
